# Supplementary material
Source: Royal Society of Chemistry journal article supplement (doi:10.1039/d6cc01668e)
Supplement: d6cc01668e1.pdf [file d6cc01668e1.pdf]

## Supplementary Information

### All-solid-state electrochromic devices based on the ultra-thin $\text{Li}_3\text{PO}_4$ electrolyte

Jiuyong Li,<sup>a,b</sup> Weiming Liu,<sup>a,b</sup> Youxiu Wei,<sup>a,b</sup> Xueting Xu <sup>c</sup> and Yue Yan <sup>\*a,b</sup>

<sup>a</sup> Baimtec Material Co., LTD., Beijing, 100095, China

<sup>b</sup> Beijing Engineering Research Center of Advanced Structural Transparency for the Modern Traffic System, Beijing, 100095, China

<sup>c</sup> Faculty of Materials Science and Engineering, Shenyang Aerospace University, Shenyang, 110136, China.

\*Corresponding author. E-mail: 15737936609@163.com

#### Content:

1. Experimental Section.
2. Cross-sectional SEM image.
3. XPS spectra.
4. AFM images.
5. Transmittance variation curves during the first 10 cycles
6. Summary of inorganic all-solid-state ECDs reported in recent years.
7. Photographs of the ECD and CIE chrominance coordinates
8. Nyquist plot
9. Performance of the ECD with ~6 nm  $\text{Li}_3\text{PO}_4$
10. Reference.

## Experimental Section

### Preparation of films and ECD

The inorganic all-solid-state ECD, with a layer structure of glass/ITO/WO<sub>3</sub>/Li/Li<sub>3</sub>PO<sub>4</sub>/NiO/ITO, was fabricated on 4 × 5 cm ITO-coated glass substrates (sheet resistance: 7 Ω/sq) via magnetron sputtering. The deposition of each layer was carried out sequentially at room temperature under a continuous vacuum environment. The mobile Li<sup>+</sup> ions in this device structure are supplied by the sputtered metallic Li; therefore, the ultra-thin Li<sub>3</sub>PO<sub>4</sub> electrolyte thickness essentially does not limit the total amount of mobile ions.

Prior to film deposition, the ITO/glass substrates were cleaned ultrasonically in anhydrous ethanol and deionized water for 10 min, followed by drying with nitrogen gas. To prevent cross-contamination, each sputtering target (74.5 mm in diameter) was fitted with a protective cover. The targets employed were Ni, Li<sub>3</sub>PO<sub>4</sub>, W, Li, and ITO (In<sub>2</sub>O<sub>3</sub>:SnO<sub>2</sub> = 90:10 wt%), positioned approximately 10 cm from the substrate. During the fabrication process, the chamber was evacuated to a base pressure of 2 × 10<sup>-4</sup> Pa, and each target was pre-sputtered for about 10 min before deposition. The substrate holder was continuously rotated to ensure film uniformity. Gas flow rates for Ar (99.999%), O<sub>2</sub> (99.999%), and an Ar–O<sub>2</sub> mixture (90% Ar + 10% O<sub>2</sub>, 99.999%) were precisely controlled using mass flow controllers. The Ar–O<sub>2</sub> mixture was used during the deposition of NiO and ITO layers to enable accurate regulation of the low oxygen flow required. Detailed deposition parameters are summarized in Table S1. After fabrication, the sample was sectioned into four identical devices, each measuring 2 × 2.5 cm<sup>2</sup>, to ensure consistency in subsequent characterization and testing. For structural analysis of individual layers, corresponding films were deposited on silica glass substrates under identical conditions used for the full ECD.

**Table S1** Detailed deposition parameters of the all-solid-state ECD.

| Film                            | Target                          | Power source | Ar: O <sub>2</sub> : Ar-O <sub>2</sub> <sup>a</sup> (sccm) | Working Pressure (Pa) | Sputtering power (W) | Thickness (nm) |
|---------------------------------|---------------------------------|--------------|------------------------------------------------------------|-----------------------|----------------------|----------------|
| ITO                             | ITO                             | DC           | 24.6:0:6                                                   | 0.5                   | 120                  | 150            |
| NiO                             | Ni                              | p-DC         | 11:0:14                                                    | 2                     | 130                  | 150            |
| Li <sub>3</sub> PO <sub>4</sub> | Li <sub>3</sub> PO <sub>4</sub> | RF           | 30:0:0                                                     | 0.3                   | 80                   | ~12            |
| WO <sub>3</sub>                 | W                               | p-DC         | 32:8:0                                                     | 1.5                   | 120                  | 300            |
| Li                              | Li                              | DC           | 30:0:0                                                     | 0.5                   | 60                   | 40             |

<sup>a</sup> Ar-O<sub>2</sub> mixture (90% Ar+10% O<sub>2</sub>).

### **Characterization and electrochemical measurements**

The phase structures of each thin film layer in the ECD were examined by X-ray diffraction (XRD,  $\lambda = 0.15418$  nm, Bruker D8 Advance). The surface morphology of the films was characterized using scanning electron microscope (SEM, Hitachi SU-8010). The surface roughness of each layer in the ECD was measured by atomic force microscope (AFM, Bruker Dimension) operating in tapping mode. The thickness of the  $\text{Li}_3\text{PO}_4$  thin film and the cross-sectional morphology of the device were determined by transmission electron microscope (TEM, FEI Tecnai G2 F30) and SEM. The TEM specimen of the device was prepared using focused ion beam (FIB, FEI Helios Nanolab600i dual beam). The chemical composition of the  $\text{Li}_3\text{PO}_4$  thin film was characterized by XPS (XPS, ESCALAB 250Xi).

The electrochemical and electrochromic properties of the devices were measured using an electrochemical workstation (CHI 660E). In order to prevent the leakage current caused by edge shorts, all edges were cut off 1–2 mm width. Electrochemical impedance spectroscopy (EIS) was performed on the device with an AC voltage of 5 mV amplitude and a frequency range from 0.1 Hz to  $10^5$  Hz. Cyclic voltammetry (CV) tests were conducted within a voltage range of -1.8 to 1.5 V at a scan rate of 50 mV/s. The cycling stability of the devices was evaluated through chronoamperometry (CA) cycles, with applied voltages and durations of -1.8 V for 40 s during coloration and 1.5 V for 30 s during bleaching. The transmittance spectra of the devices in the colored and bleached states were measured using a UV-Vis-NIR spectrophotometer (Agilent Cary 5000) over a wavelength range of 380-800 nm. The in-situ variation in transmittance of the ECD over time was also recorded using the spectrophotometer.

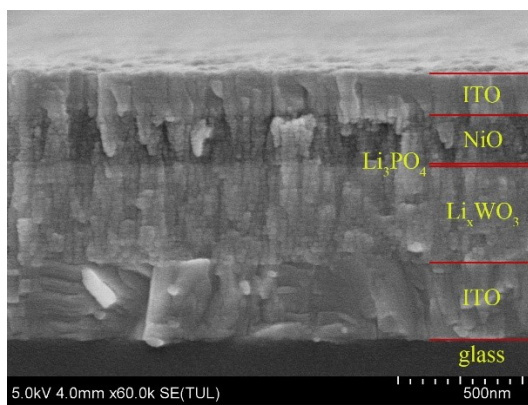

Fig. S1 Cross-sectional SEM image of the all-solid-state ECD

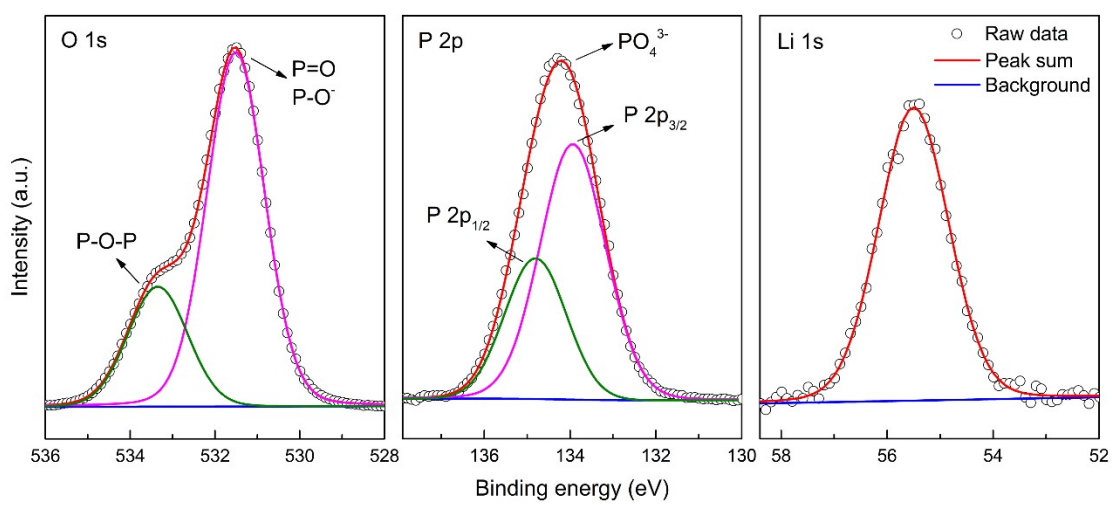

Fig. S2 XPS spectra of O 1s, P 2p and Li 1s core levels of the  $\text{Li}_3\text{PO}_4$  layer

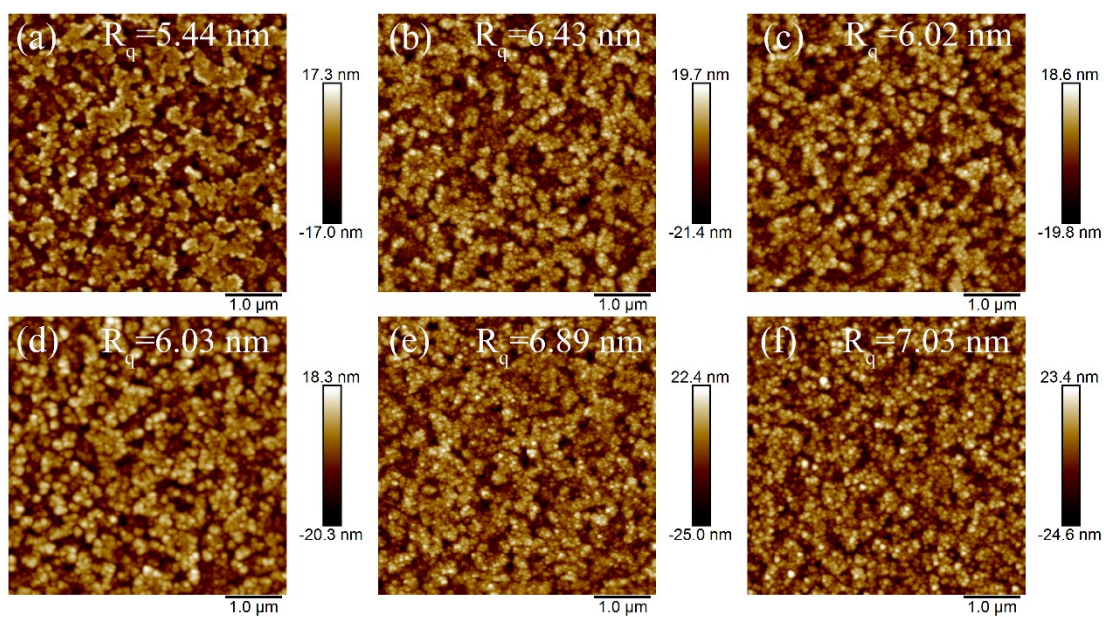

Fig. S3 AFM images of the films (a) glass/ITO, (b) glass/ITO/WO<sub>3</sub>, (c) glass/ITO/WO<sub>3</sub>/Li, (d) glass/ITO/WO<sub>3</sub>/Li/Li<sub>3</sub>PO<sub>4</sub>, (e) glass/ITO/WO<sub>3</sub>/Li/Li<sub>3</sub>PO<sub>4</sub>/NiO, and (f) glass/ITO/WO<sub>3</sub>/Li/Li<sub>3</sub>PO<sub>4</sub>/NiO/ITO

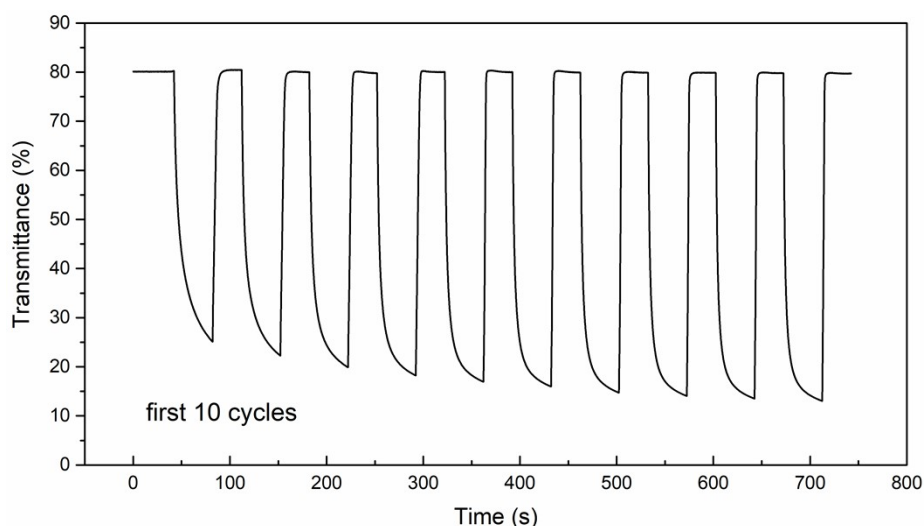

Fig. S4 Transmittance variation curves of the ECD during the first 10 cycles of CA measurement

Typically, ECDs undergo a characteristic electrochemical activation process in the initial cycles, during which the ion insertion/extraction behavior is not yet fully stabilized, leading to transient performance fluctuations. As shown in Fig. S4, during the first 10 cycles, the bleached-state transmittance of the device remains nearly constant, while the colored-state transmittance gradually decreases and then stabilizes, corresponding to a progressive deepening of coloration until saturation. This phenomenon is primarily attributed to the gradual penetration and full insertion of electrolyte ions into the electrochromic film in the early cycles, which fills the incompletely connected ion transport pathways and enables more active sites to participate in the electrochromic reaction, thereby improving the coloration efficiency and manifesting as a reduction in colored-state transmittance. As the cycles proceed, the ion insertion/extraction gradually reaches a reversible equilibrium, and the device performance becomes stable. Therefore, to more accurately evaluate the long-term cycling stability of the device, we selected the 10th cycle data after nearly completing the activation process as the performance baseline for the initial stage, to eliminate the non-steady-state influence caused by the initial conditioning process.

**Table S2.** Summary of inorganic all-solid-state ECDs based on various electrolyte layers in recent years.

| Ref.             | Structure of ECDs                                                                                                                    | Electrolyte thickness <sup>a</sup> (nm) | $\Delta T_{\max}$ (%) | $t_c/t_b$ (s)  | CE ( $\text{cm}^2 \cdot \text{C}^{-1}$ ) | Cycling stability <sup>b</sup>     |
|------------------|--------------------------------------------------------------------------------------------------------------------------------------|-----------------------------------------|-----------------------|----------------|------------------------------------------|------------------------------------|
| 1                | glass/ITO/NiO/Si <sub>3</sub> N <sub>4</sub> /Li <sub>x</sub> Mg <sub>y</sub> N/WO <sub>3</sub> /ITO                                 | 450                                     | 40                    | -              | 77.0                                     | 57.5% after 1000 CA cycles         |
| 2                | glass/ITO/NiO <sub>x</sub> :H/ZrO <sub>2</sub> /WO <sub>3</sub> /ITO                                                                 | -                                       | 68                    | 70/42          | -                                        | 100% after 25 cycles               |
| 3                | PET/ITO/NiO <sub>x</sub> /Ta <sub>2</sub> O <sub>5</sub> :H/WO <sub>3</sub> /ITO                                                     | 247                                     | 60                    | -              | -                                        | 100% after 125 cycles              |
| 4                | PET/ITO/NiO <sub>x</sub> /LiTaO <sub>3</sub> /WO <sub>3</sub> /ITO                                                                   | -                                       | 65.2                  | 7/55           | 68.5                                     | -                                  |
| 5                | glass/ITO/NiO <sub>x</sub> /LiTaO <sub>3</sub> /WO <sub>3</sub> /ITO                                                                 | 440                                     | 67                    | 85/42          | -                                        | -                                  |
| 6                | glass/ITO/NiO <sub>x</sub> /Ta <sub>2</sub> O <sub>5</sub> /LiNbO <sub>3</sub> /Ta <sub>2</sub> O <sub>5</sub> /WO <sub>3</sub> /ITO | 560                                     | 52.5                  | 21/21          | 98.0                                     | 64% after 10000 cycles             |
| 7                | glass/ITO/NiO/Si <sub>3</sub> N <sub>4</sub> /LiNbO <sub>3</sub> /Si <sub>3</sub> N <sub>4</sub> /WO <sub>3</sub> /ITO               | 290                                     | 43                    | -              | -                                        | 100% after 100 cycles              |
| 8                | glass/ITO/NiO/ZrO <sub>2</sub> /Li/WO <sub>3</sub> /ITO                                                                              | 100                                     | 64.9                  | 48/6           | 106.6                                    | 98% after 4000 cycles <sup>c</sup> |
| 9                | glass/ITO/WO <sub>3</sub> /LiNbO <sub>3</sub> /Al-LiNiO <sub>x</sub> /ITO                                                            | 426                                     | 45                    | 17.9/4.1       | 55                                       | 77.8% after 10000 cycles           |
| 10               | glass/ITO/NiO/Ta <sub>2</sub> O <sub>5</sub> /WO <sub>3</sub> /ITO                                                                   | 130                                     | 50                    | 13/5           | -                                        | 89% after 2000 cycles              |
| 11               | glass/ITO/WO <sub>3</sub> /LiF/NiO/ITO                                                                                               | 90                                      | 58.9                  | 9.6/4          | 88.5                                     | 99% after 300 cycles               |
| 12               | glass/ITO/NiO/Ta <sub>2</sub> O <sub>5</sub> /LiAlSiO <sub>4</sub> /Ta <sub>2</sub> O <sub>5</sub> /WO <sub>3</sub> /ITO             | 120                                     | 50.8                  | 25/32.7        | 60.3                                     | 81.5% after 1000 cycles            |
| 13               | glass/ITO/WO <sub>3</sub> /MgF <sub>2</sub> /NiO/ITO                                                                                 | 230                                     | 66.4                  | 19.2/8.3       | 27.7                                     | -                                  |
| 14               | glass/ITO/WO <sub>3</sub> /CaF <sub>2</sub> /NiO/ITO                                                                                 | 185                                     | 38.8                  | 22.8/2.8       | 52.4                                     | 62.2% after 125 cycles             |
| 15               | glass/ITO/NiO <sub>x</sub> /LiPON/WO <sub>3</sub> /ITO                                                                               | 450                                     | 68.4                  | 27             | -                                        | 89.9% after 200 cycles             |
| 16               | glass/ITO/WO <sub>3</sub> /Al <sub>2</sub> SiO <sub>5</sub> /NiO <sub>x</sub> /ITO                                                   | 80                                      | 44.58                 | 14.8/3.7       | 98.17                                    | 94.2% after 70 cycles              |
| 17               | glass/ITO/WO <sub>3</sub> /Li/Ta <sub>2</sub> O <sub>5</sub> /NiO/ITO                                                                | 450                                     | 44.9                  | 5.1/0.9        | 65.2                                     | 86.1% after 1000 cycles            |
| <b>This work</b> | <b>glass/ITO/WO<sub>3</sub>/Li/Li<sub>3</sub>PO<sub>4</sub>/NiO/ITO</b>                                                              | <b>~12</b>                              | <b>69.5</b>           | <b>9.7/2.5</b> | <b>76.4</b>                              | <b>89.9% after 1000 cycles</b>     |

<sup>a</sup> If the device contains an electron-blocking layer, it is also considered part of the electrolyte layer, as it effectively serves to conduct ions and block electrons.

<sup>b</sup> Defined as the percentage of  $\Delta T$  after the cycle to the initial  $\Delta T$ .

<sup>c</sup> It is expressed as the percentage of  $\Delta T$  after the cycle to the maximum  $\Delta T$ .

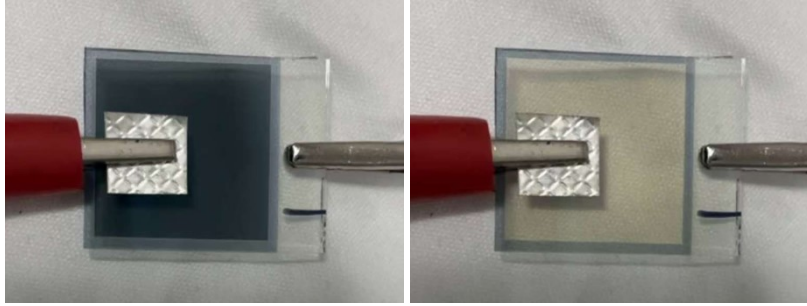

Fig. S5 Photographs of the ECD in the colored and bleached states.

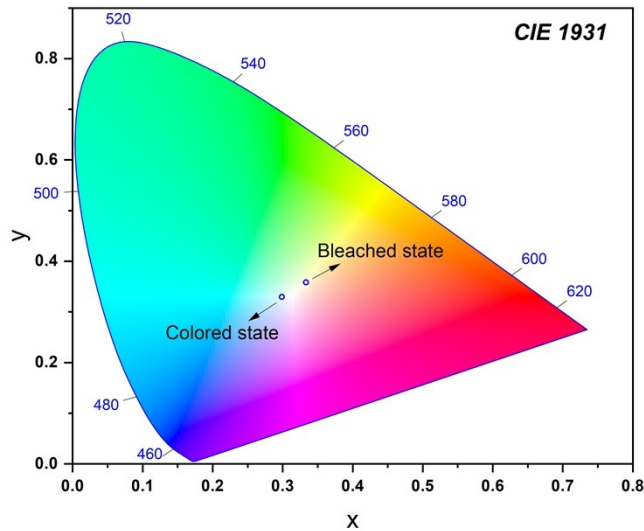

Fig. S6 CIE chrominance coordinates of the ECD in colored and bleached states.

Table S3. Color parameters of the ECD in bleached and colored states

|                | $L^*$ | $a^*$ | $b^*$ | $\Delta E$ |
|----------------|-------|-------|-------|------------|
| Colored state  | 40.52 | -3.93 | -1.06 | 50.62      |
| Bleached state | 88.90 | -3.45 | 13.83 |            |

The electrochromic performance of the device was quantitatively characterized using the CIE 1931 chromaticity diagram and the CIE  $Lab^*$  color space. As shown in the Fig. S6 and Table S2, the colored state exhibited CIE  $Lab^*$  coordinates of  $L^*=40.52$ ,  $a^*=-3.93$ , and  $b^*=-1.06$ , corresponding to a low-luminance, neutral blue-green hue. Upon bleaching, the values shifted to  $L^*=88.9$ ,  $a^*=-3.45$ , and  $b^*=13.83$ , with a substantial increase in luminance and a movement of the chromaticity coordinates toward the white light region in the CIE 1931 diagram. The total color difference ( $\Delta E$ ) between the two states, calculated by the formula:

$$\Delta E = \sqrt{[(L^*_{bl} - L^*_{col})^2 + (a^*_{bl} - a^*_{col})^2 + (b^*_{bl} - b^*_{col})^2]}$$

was found to be approximately 50.62, indicating a high optical contrast between the colored and bleached states. Notably, the color change was dominated by luminance modulation with negligible chromaticity shift, demonstrating outstanding neutral-tone electrochromic characteristics that meet the requirements of low chromatic interference and high transmittance modulation for applications such as smart windows.

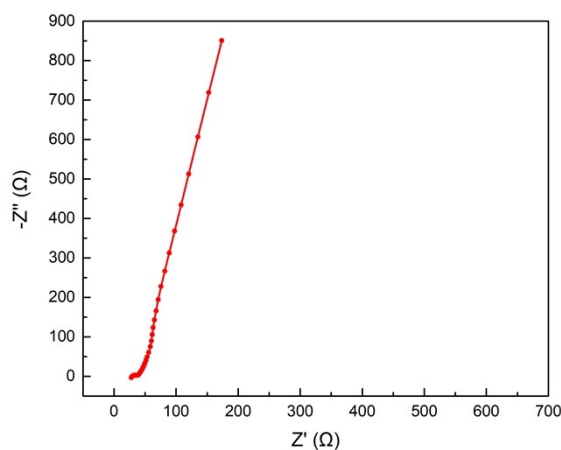

Fig. S7 Nyquist plot of the all-solid-state ECD.

Electrochemical impedance spectroscopy (EIS) measurements were performed on the fabricated all-solid-state ECD. The resulting Nyquist plot is presented in Fig. S7. The spectrum consists of a small depressed semicircle at high-to-intermediate frequencies, followed by a Warburg-type diffusion tail at low frequencies.

Given the multi-layered architecture of the device (glass/ITO/ $\text{WO}_3$ /Li/ $\text{Li}_3\text{PO}_4$ /NiO/ITO), the impedance response arises from overlapping contributions: (1) ohmic resistance of the electrodes and the electrolyte, (2) charge-transfer resistance at the  $\text{WO}_3$ /electrolyte and electrolyte/NiO interfaces, and (3) solid-state diffusion of  $\text{Li}^+$  ions. Due to the superposition of these processes, it is not possible to unambiguously resolve the intrinsic ionic conductivity of the  $\text{Li}_3\text{PO}_4$  electrolyte or the  $\text{Li}^+$  diffusion coefficient in the  $\text{WO}_3$  layer from this full-device measurement alone. Nonetheless, the characteristic Warburg tail confirms the occurrence of  $\text{Li}^+$  diffusion processes, and the overall impedance behavior is consistent with the device's fast switching speed and high coloration efficiency, indirectly supporting efficient  $\text{Li}^+$  transport across the ultrathin  $\text{Li}_3\text{PO}_4$  electrolyte and within the electrochromic layer.

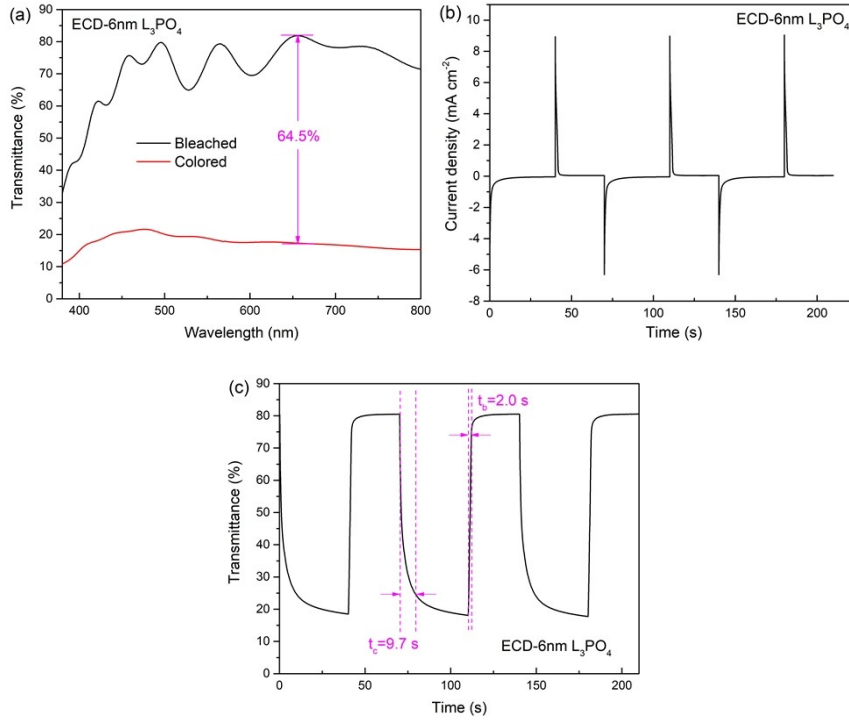

Fig. S8 (a) The transmittance spectra, (b) current density-time curve of the ECD with  $\sim 6 \text{ nm}$   $\text{Li}_3\text{PO}_4$  and (c) corresponding in-situ transmittance measurements at 655 nm.

To further verify the feasibility of the ultrathin electrolyte strategy, an ECD with a 6 nm-thick  $\text{Li}_3\text{PO}_4$  electrolyte was prepared. As shown in Fig. S8, the device exhibits an optical modulation depth of 64.5%, coloration/bleaching response times of 9.7 s and 2.0 s, and leakage current densities of  $41.3 \mu\text{A cm}^{-2}$  and  $43.5 \mu\text{A cm}^{-2}$  in the colored and bleached states, respectively. The performance is comparable to that of the  $\sim 12 \text{ nm}$  device, with only a slight decrease in optical modulation and a slight increase in leakage current. This is very likely because the underlying  $\text{Li}_x\text{WO}_3$  layer has a root-mean-square roughness of 6.02 nm (Fig. S3c), which increases the probability of pinholes and defects in the extremely thin 6 nm  $\text{Li}_3\text{PO}_4$  layer, thereby slightly weakening its electron-blocking capability. These results further support the reliability and generality of our ultrathin electrolyte approach.

## REFERENCES

- (1) Xiao, Y.; Dong, G.; Huang, Q.; Liu, Q.; Guo, J.; Liu, J.; Zhang, J.; Diao, X. Electro-optical performance of inorganic monolithic electrochromic device with a pulsed DC sputtered  $\text{Li}_x\text{Mg}_y\text{N}$  ion conductor. *J. Solid State Electrochem.* 2017, 22 (1), 275-283.
- (2) Dong, D.; Wang, W.; Dong, G.; Zhou, Y.; Wu, Z.; Wang, M.; Liu, F.; Diao, X. Electrochromic properties of  $\text{NiO}:\text{H}$  films deposited by DC magnetron sputtering for ITO/ $\text{NiO}:\text{H}/\text{ZrO}_2/\text{WO}_3/\text{ITO}$  device. *Appl. Surf. Sci.* 2015, 357, 799-805.
- (3) Dong, D.; Wang, W.; Dong, G.; Zhang, F.; He, Y.; Yu, H.; Liu, F.; Wang, M.; Diao, X. Electrochromic properties and performance of  $\text{NiO}_x$  films and their corresponding all-thin-film flexible devices prepared by reactive DC magnetron sputtering. *Appl. Surf. Sci.* 2016, 383, 49-56.
- (4) Liu, Q.; Dong, G.; Xiao, Y.; Gao, F.; Wang, M.; Wang, Q.; Wang, S.; Zuo, H.; Diao, X. An all-thin-film inorganic electrochromic device monolithically fabricated on flexible PET/ITO substrate by magnetron sputtering. *Mater. Lett.* 2015, 142, 232-234.
- (5) Song, X.; Dong, G.; Gao, F.; Xiao, Y.; Liu, Q.; Diao, X. Properties of  $\text{NiO}_x$  and its influence upon all-thin-film ITO/ $\text{NiO}_x/\text{LiTaO}_3/\text{WO}_3/\text{ITO}$  electrochromic devices prepared by magnetron sputtering. *Vacuum* 2015, 111, 48-54.
- (6) Liu, Q.; Dong, G.; Chen, Q.; Guo, J.; Xiao, Y.; Delplancke-Ogletree, M.-P.; Reniers, F.; Diao, X. Charge-transfer kinetics and cyclic properties of inorganic all-solid-state electrochromic device with remarkably improved optical memory. *Sol. Energy Mater. Sol. Cells* 2018, 174, 545-553.
- (7) Huang, Q.; Dong, G.; Xiao, Y.; Diao, X. Electrochemical studies of silicon nitride electron blocking layer for all-solid-state inorganic electrochromic device. *Electrochim. Acta* 2017, 252, 331-337.
- (8) Li, W.; Zhang, X.; Chen, X.; Zhao, Y.; Wang, L.; Chen, M.; Li, Z.; Zhao, J.; Li, Y. Lithiation of  $\text{WO}_3$  films by evaporation method for all-solid-state electrochromic devices. *Electrochim. Acta* 2020, 355, 136817.
- (9) Wang, C.; Dong, G.; Zhao, Y.; He, Y.; Ding, Y.; Du, X.; Zhong, X.; Wang, M.; Diao, X. Enhanced electrochromic performance on anodic nickel oxide inorganic device via lithium and aluminum co-doping. *J. Alloys Compd.* 2020, 821, 153365.
- (10) Chen, P.-W.; Chang, C.-T.; Ali, M. M.; Wu, J.-Y.; Li, Y.-C.; Chen, M.-H.; Jan, D.-J.; Yuan, C.-T. Tantalum oxide film deposited by vacuum cathodic arc plasma with improved electrochromic performance. *Sol. Energy Mater. Sol. Cells* 2018, 182, 188-195.
- (11) Chen, X.; Dou, S.; Li, W.; Liu, D.; Zhang, Y.; Zhao, Y.; Li, Y.; Zhao, J.; Zhang, X. All solid state electrochromic devices based on the LiF electrolyte. *Chem. Commun.* 2020, 56 (37), 5018-5021.
- (12) Zhao, Y.; Zhang, X.; Chen, X.; Li, W.; Li, Z.; Chen, M.; Sun, W.; Zhao, J.; Li, Y. All-solid-state electrochromic devices based on the  $\text{LiAlSiO}_4$  electrolyte. *Mater. Lett.* 2021, 292, 129592.
- (13) Chen, X.; Li, W.; Dou, S.; Wang, L.; Zhao, Y.; Zhang, X.; Li, Y.; Zhao, J.  $\text{MgF}_2$  as abundant and environmentally friendly electrolytes for high performance electrochromic devices. *J. Materiomics* 2021, 7 (6), 1318-1323.
- (14) Chen, X.; Zhang, H.; Li, W.; Xiao, Y.; Zhang, X.; Li, Y.  $\text{CaF}_2$ : A novel electrolyte for all solid-state electrochromic devices. *Environ. Sci. Ecotechnology* 2022, 10, 100164.
- (15) H. Wang, J. Wang, Q. Shi, Y. Su, P. Tang, S. Huang, S. Lin, M. Dai. Influence of LiPON thickness on the electro-optical performance of inorganic all-solid-state electrochromic devices. *Sol. Energy Mater. Sol. Cells*, 2023, 251, 112140.
- (16) J. Wang, S. Xie, Q. Shi, H. Wang, H. Yang, S. Lin, M. Dai. Effect of the thicknesses of the  $\text{Al}_2\text{SiO}_5$

ion conductor on the opto-electrical properties for all-solid electrochromic devices, *Ceram. Int.*, 2022, 48, 31491-31499.

(17) J. Li, Y. Wei, W. Liu, Z. Wang, Y. Yan, Influence of Ta<sub>2</sub>O<sub>5</sub> electrolyte thickness on the electro-optical performance of all-solid-state electrochromic devices, *J. Phys. Chem. Solids*, 2025, 204, 112784.
